# Supplementary material for: Design and Synthesis of a Novel ICT Bichromophoric pH Sensing System Based on 1,8-Naphthalimide Fluorophores as a Two-Input Logic Gate and Its Antibacterial Evaluation
Source: MDPI journal article supplement (doi:10.3390/molecules28083631), 2023-04-21
Supplement: s1 [file s1]

## SUPPLEMENTARY INFORMATION

### Design and Synthesis of a Novel ICT Bichromophoric pH Sensing System Based on 1,8-Naphthalimide Fluorophores as a Two-Input Logic Gate and Its Antibacterial Evaluation

**Table S1.** Photophysical characteristics of compound **5** in solvents of different polarity.

|          | Chloroform       |                  |       |  | Acetonitrile     |                  |  | Ethanol          |                  |  | DMF              |                  |
|----------|------------------|------------------|-------|--|------------------|------------------|--|------------------|------------------|--|------------------|------------------|
|          | $\lambda_A$ (nm) | $\lambda_F$ (nm) | $Q_F$ |  | $\lambda_A$ (nm) | $\lambda_F$ (nm) |  | $\lambda_A$ (nm) | $\lambda_F$ (nm) |  | $\lambda_A$ (nm) | $\lambda_F$ (nm) |
| <b>5</b> | 340              | 360              | 0.35  |  | 342              | 375              |  | 342              | 380              |  | 342              | 395              |
|          | 378              | 496              |       |  | 390              | 498              |  | 402              | 500              |  | 404              | 516              |

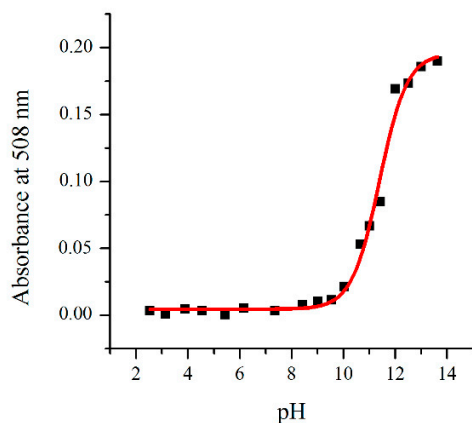

**Figure S1.** Titration plot of dyad **5** at  $\lambda_A = 508$  nm in a pH range ca. 2-14.

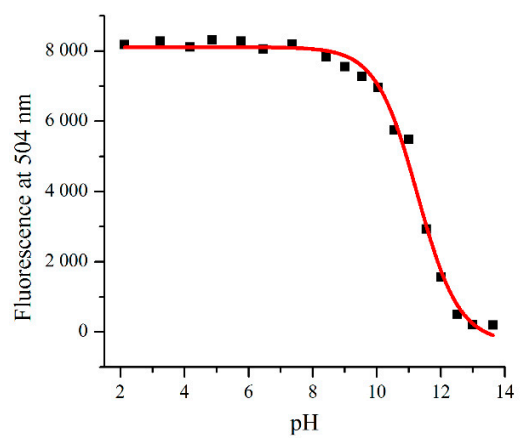

**Figure S2.** Titration plot of dyad **5** at  $\lambda_F = 504$  nm in a pH range ca. 2-14 ( $\lambda_{EX} = 400$  nm).

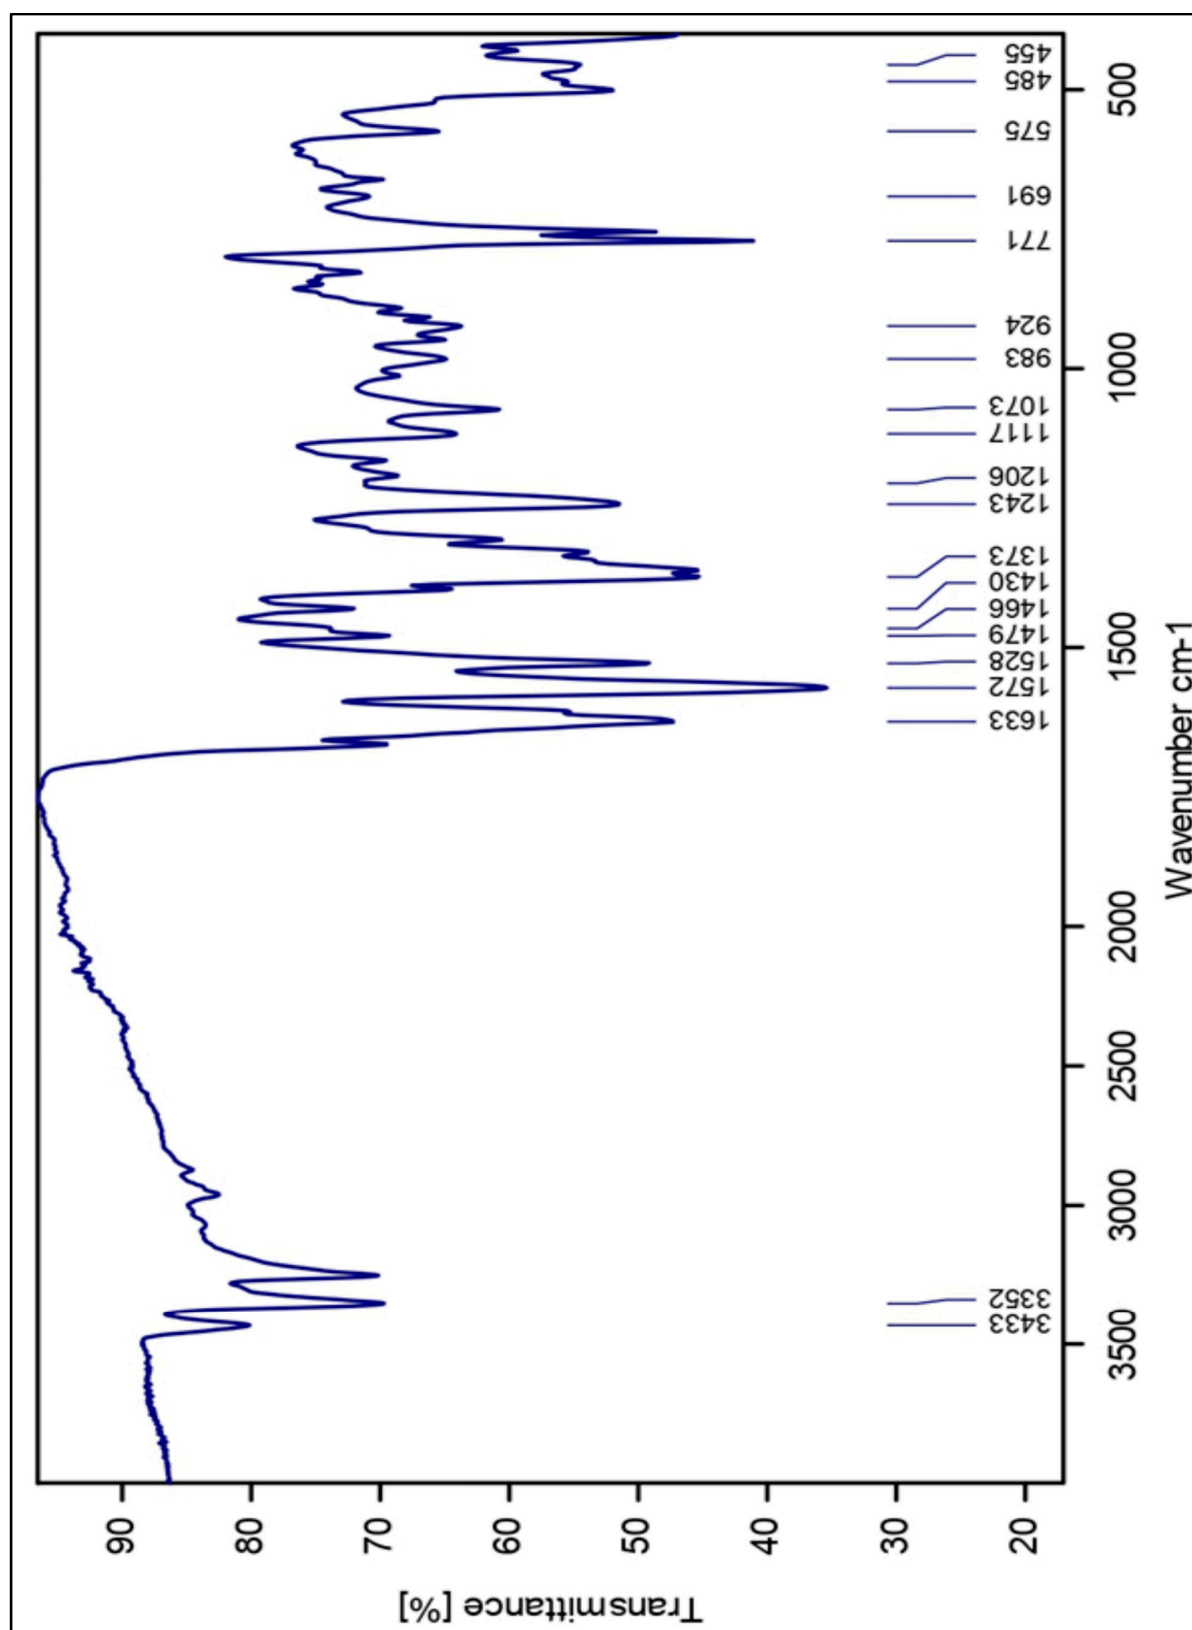

**Figure S3:** IR spectrum of compound 3.

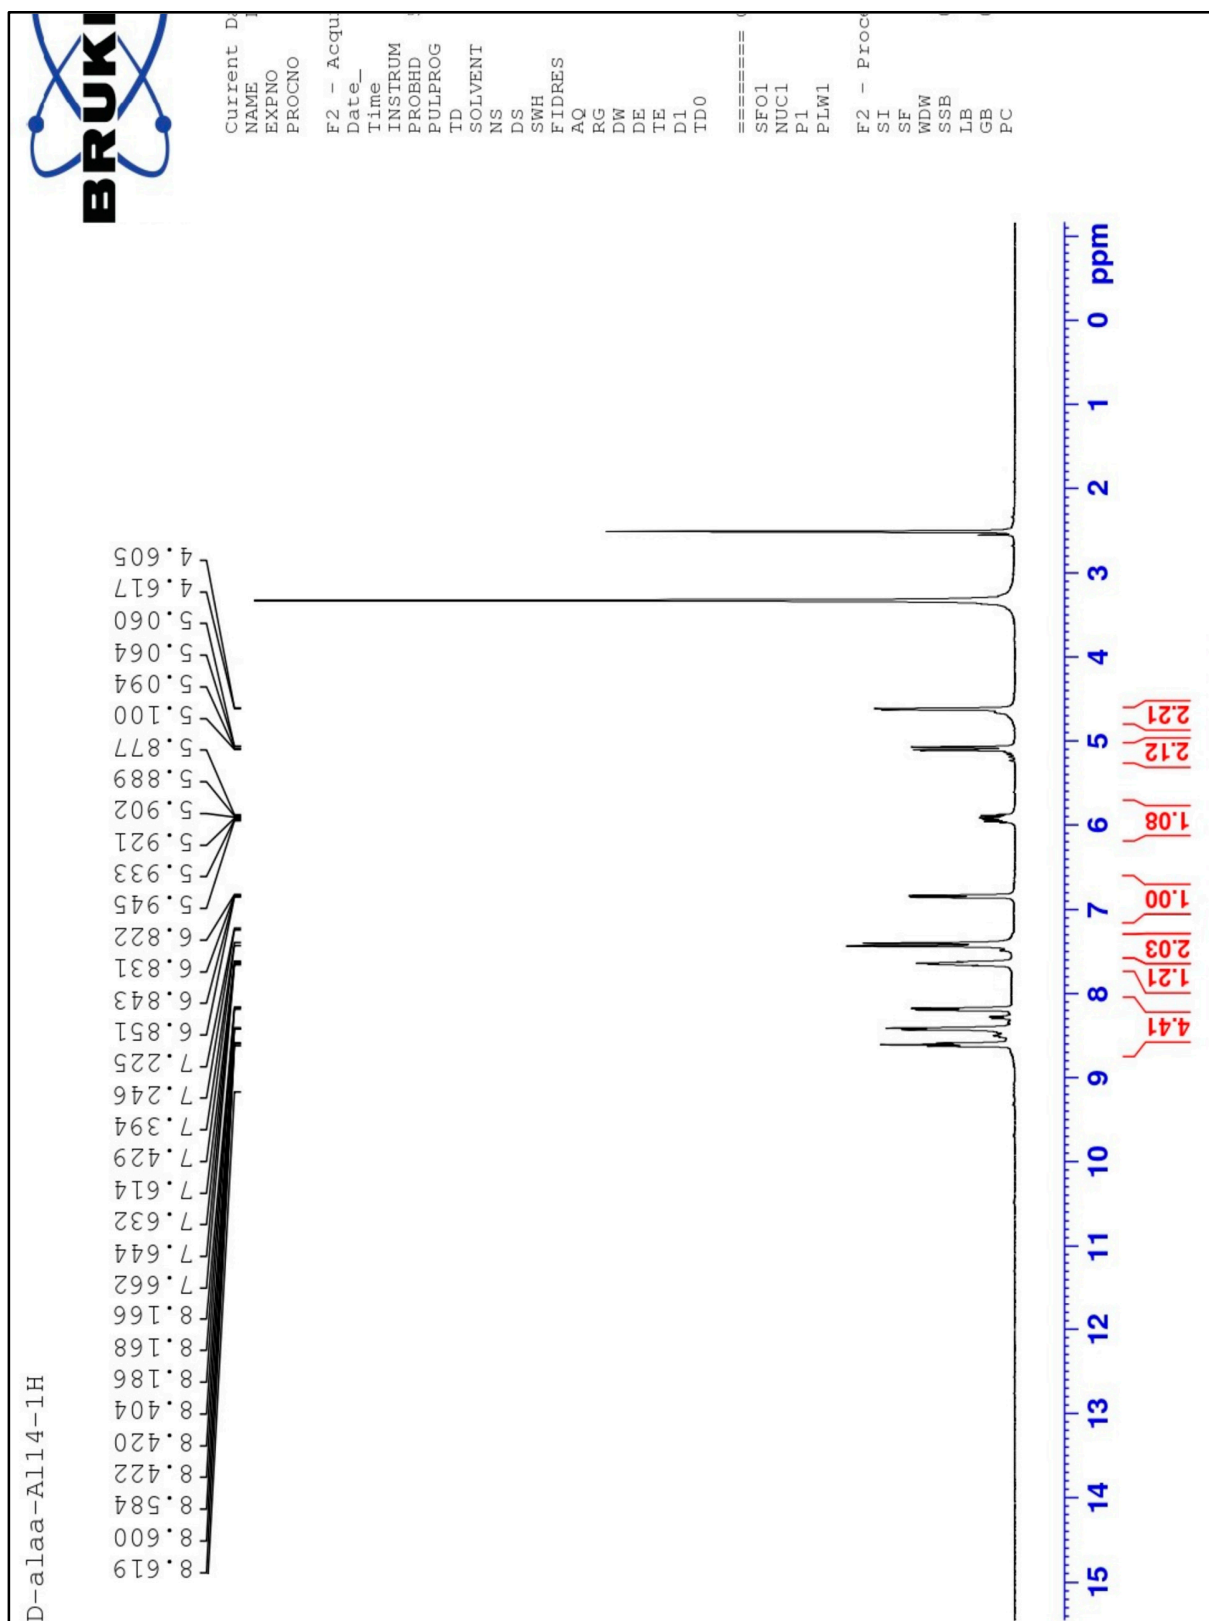

**Figure S4.**  $^1\text{H}$  NMR Spectrum of compound 3.



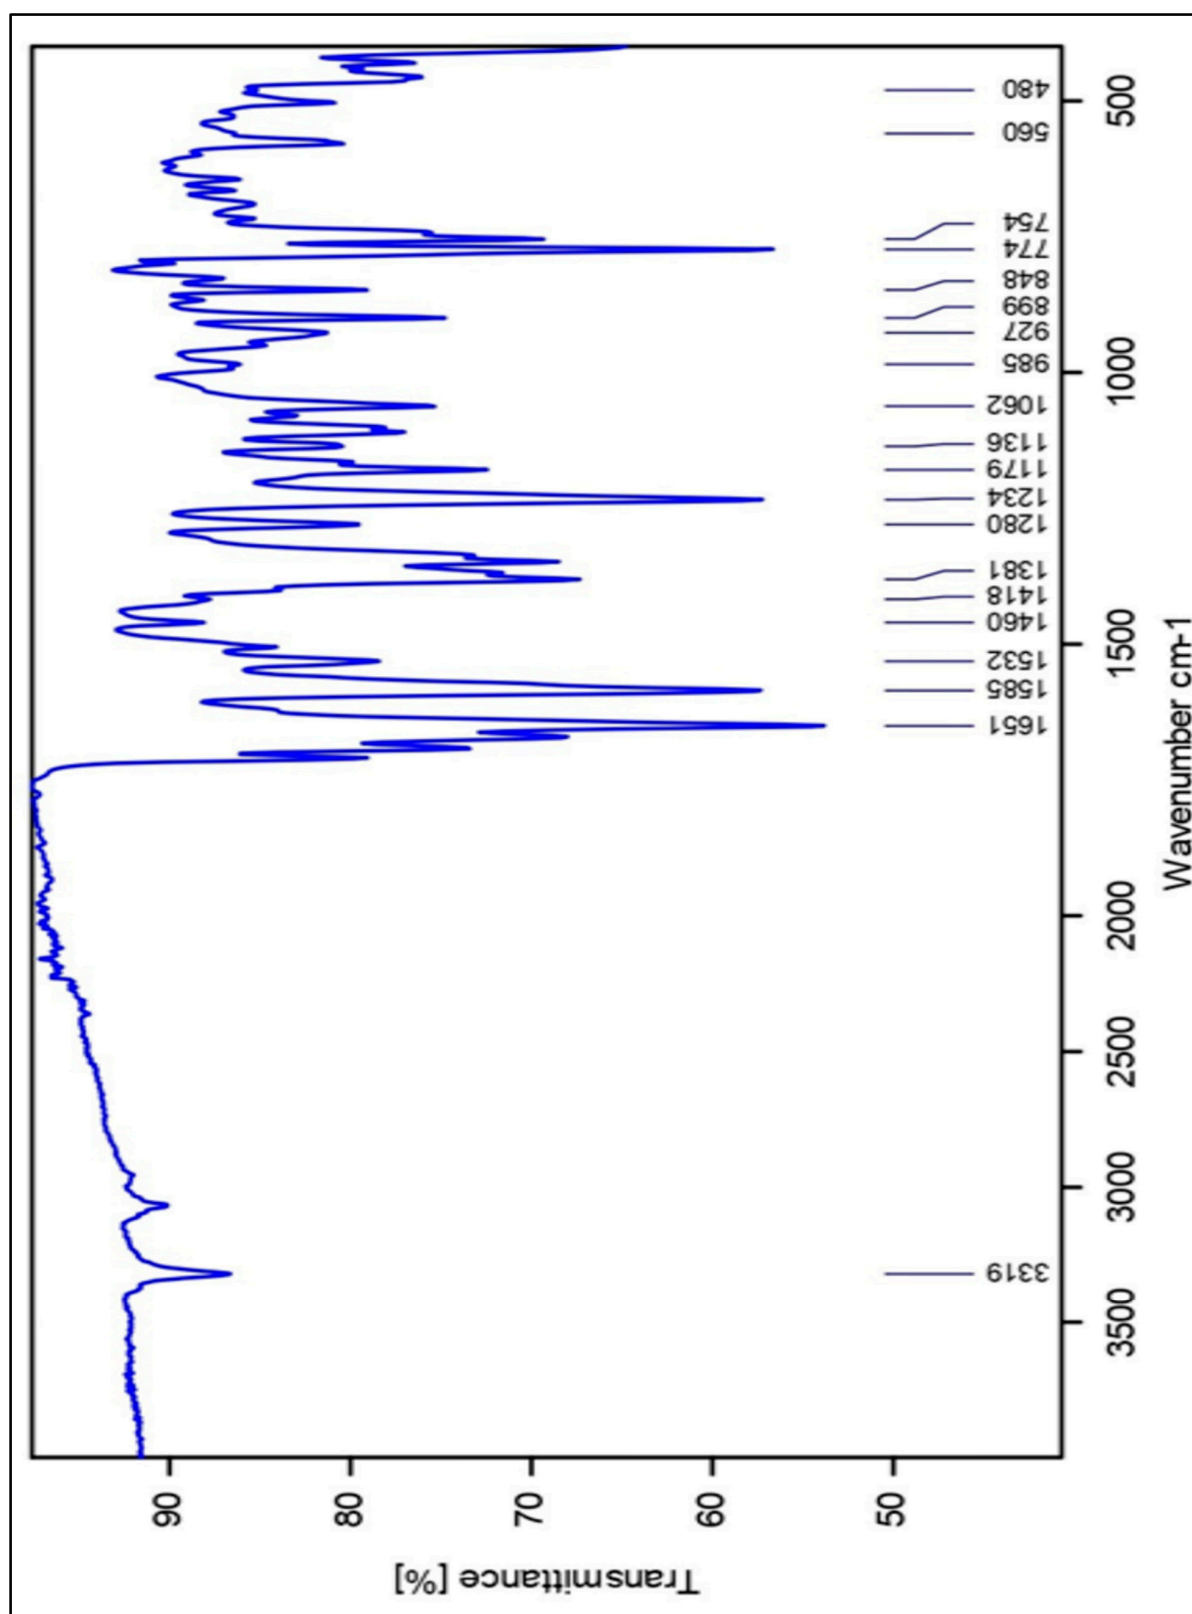

Figure S5: IR spectrum of dyad 5.

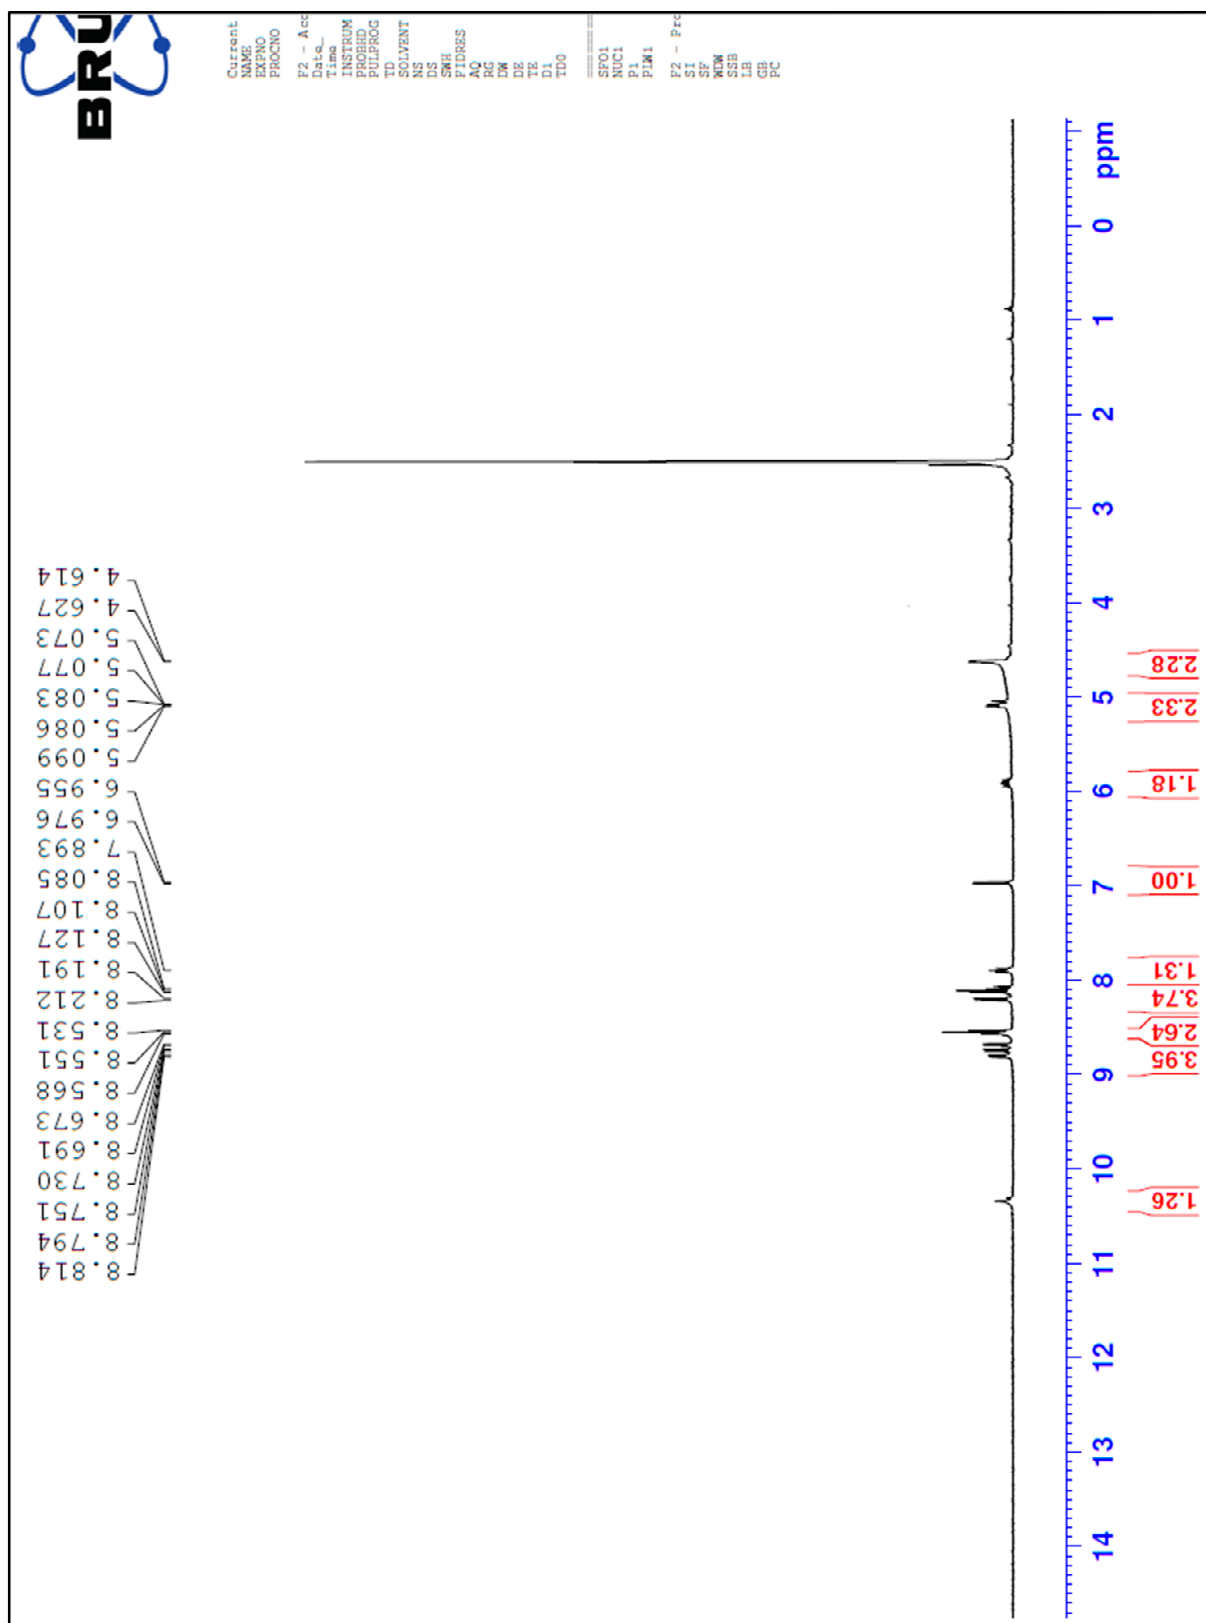

**Figure S6.**  $^1\text{H}$  NMR Spectrum of dyad **5**.



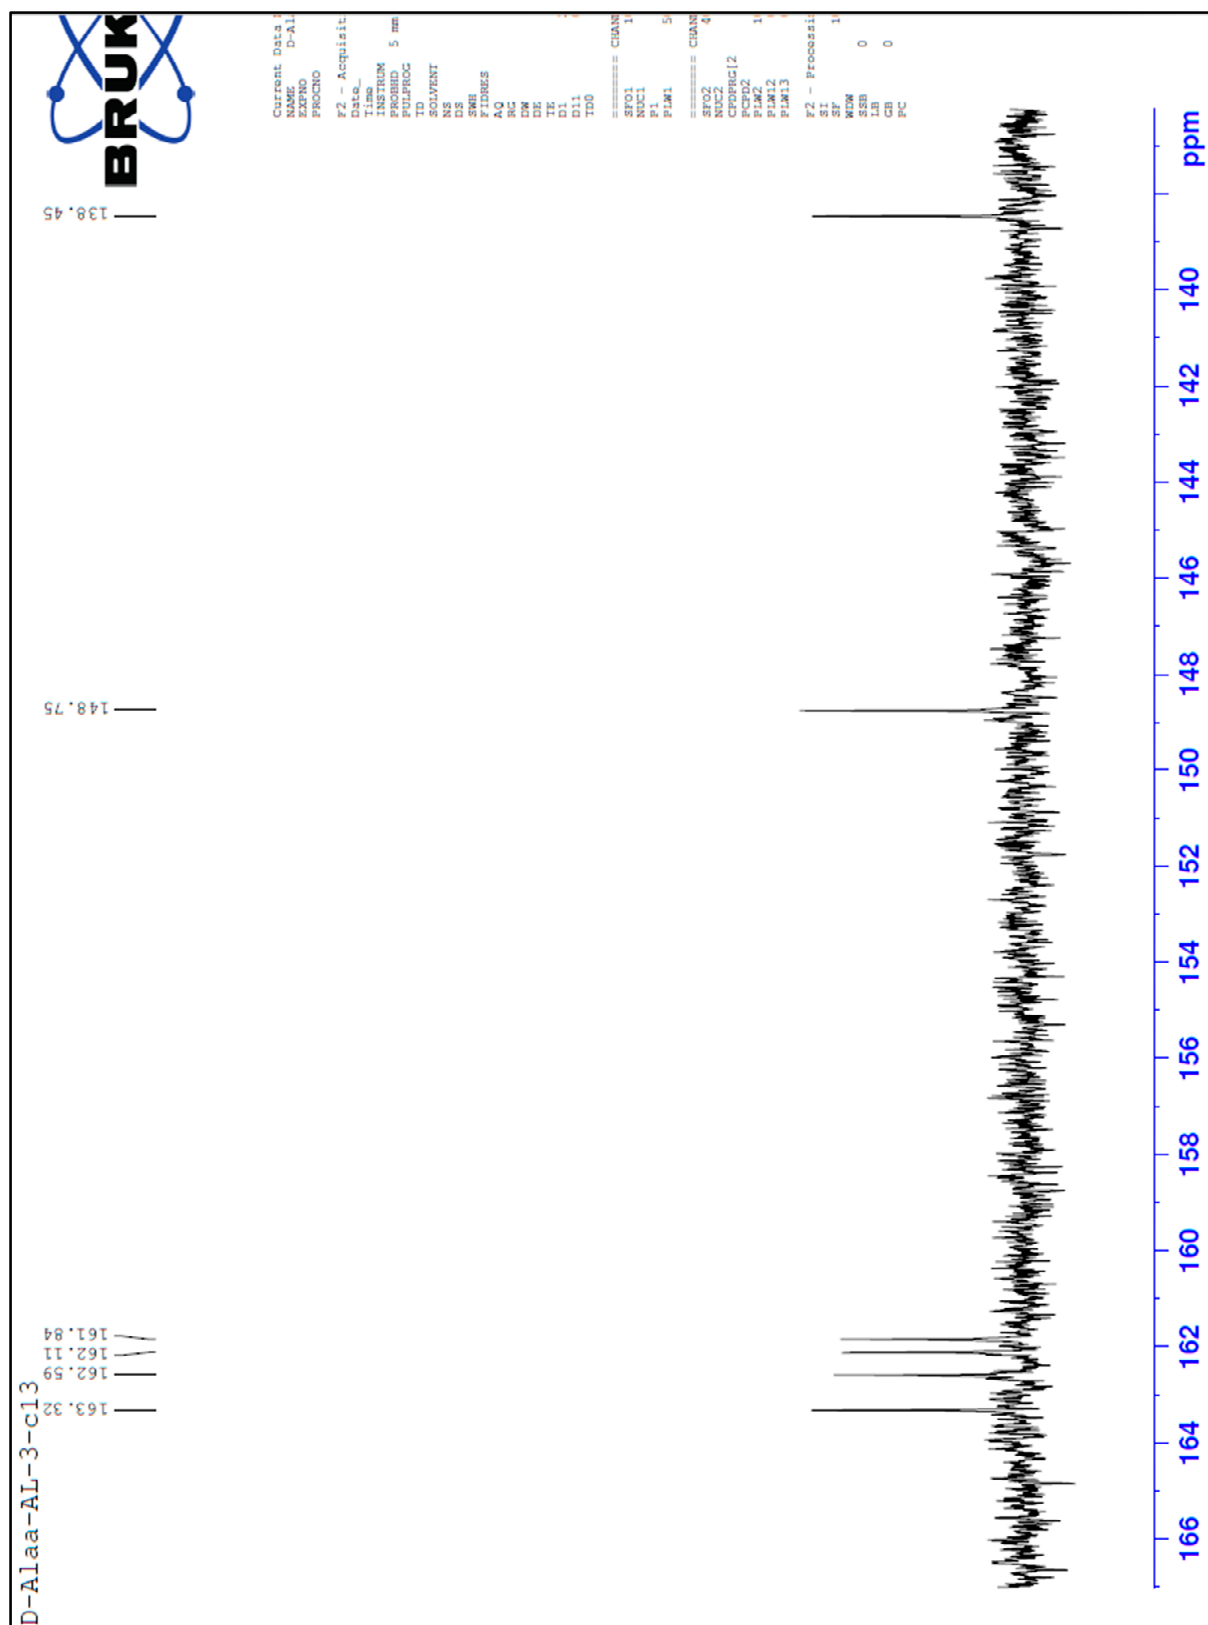

**Figure S8.**  $^{13}\text{C}$  NMR Spectrum of dyad **5** in a range of 164-138 ppm.



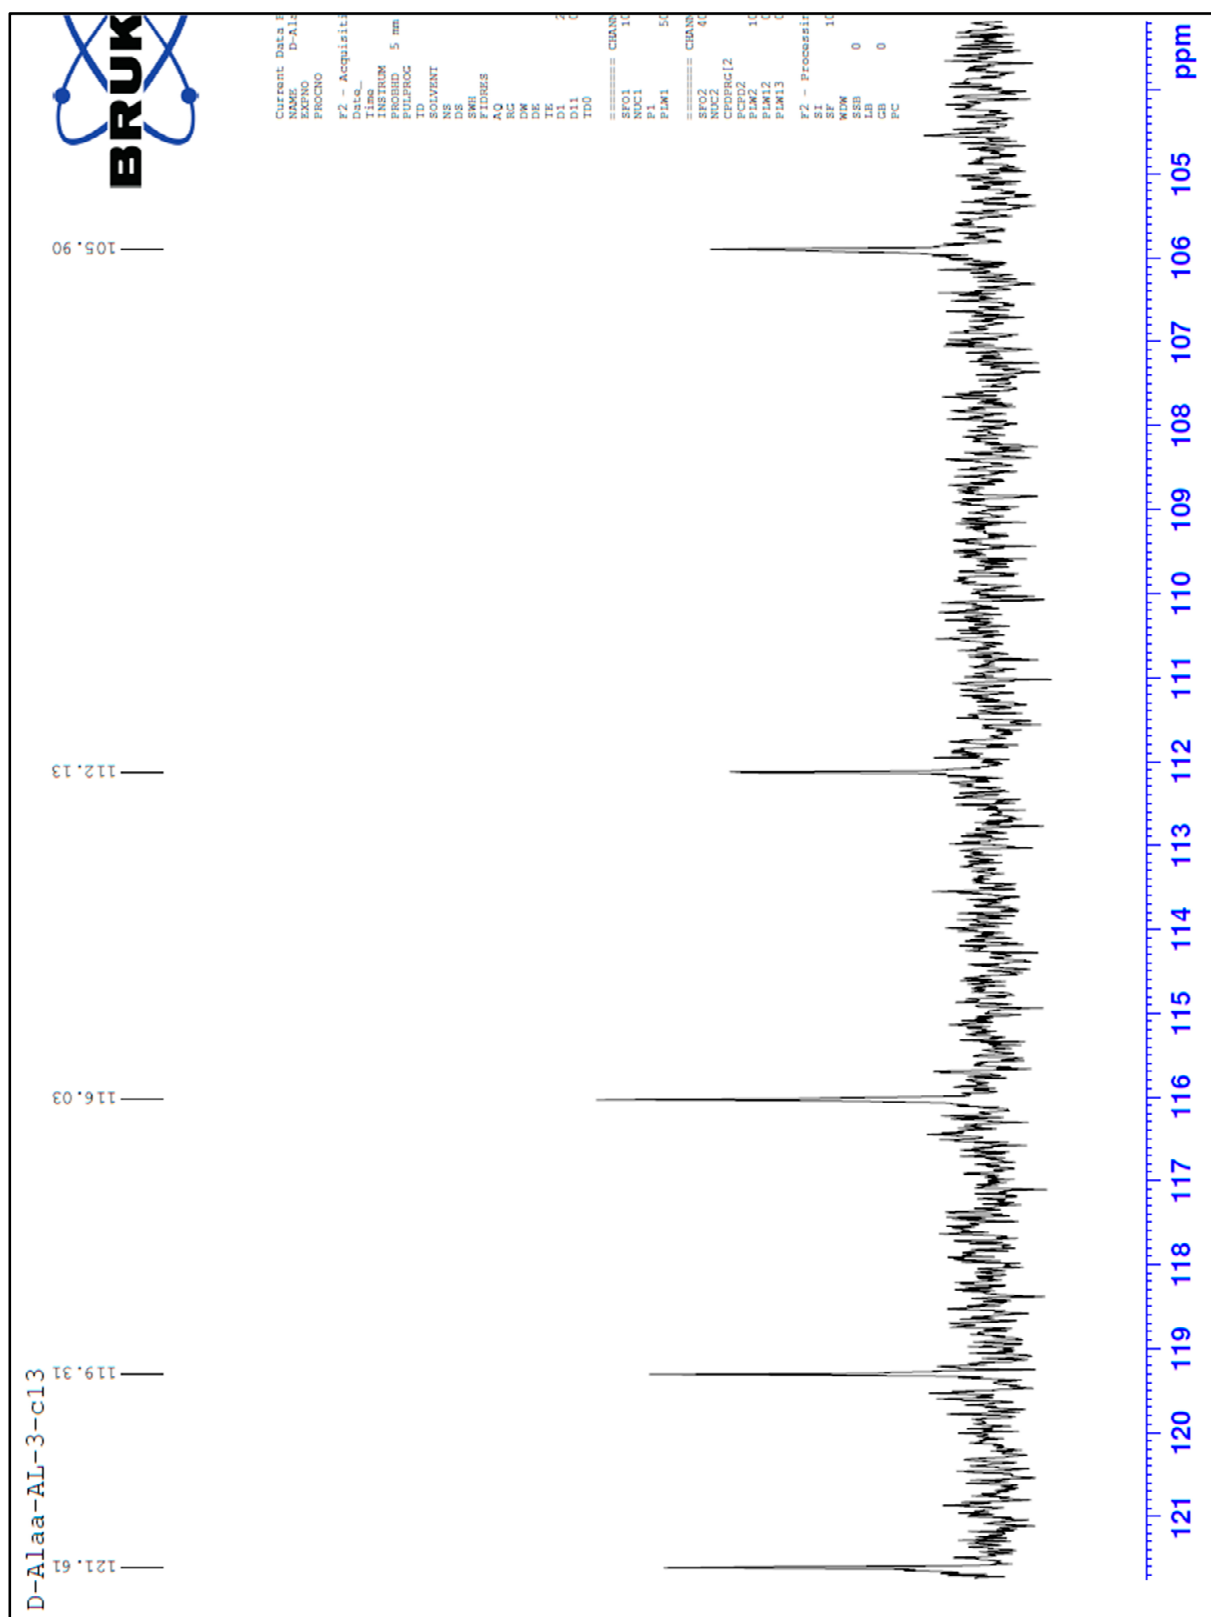

**Figure S10.**  $^{13}\text{C}$  NMR Spectrum of dyad **5** in a range of 122-105 ppm.
